# Supplementary material for: Fresh Basil Infusion: Effect of Sous-Vide Heat Treatment on Their Volatile Composition Profile, Sensory Profile, and Color
Source: MDPI journal article supplement (doi:10.3390/molecules27010005), 2021-12-21
Supplement: s1 [file s1]

**Table S1.** Sensory lexicon used in the study

| descriptor                                  | definition                                                                                                                                                               | word anchors       |
|---------------------------------------------|--------------------------------------------------------------------------------------------------------------------------------------------------------------------------|--------------------|
| <b>odor</b>                                 |                                                                                                                                                                          |                    |
| fresh                                       | fresh, characteristic of cut herbs e.g. mint, cress                                                                                                                      | none - very strong |
| natural basil                               | aroma characteristic for fresh sweet basil, intense                                                                                                                      | none - very strong |
| herbal                                      | characteristic of dried basil or herbal mixture of provencal herbs                                                                                                       | none - very strong |
| sweet                                       | pleasant, sweet-smelling aroma, typical of caramel or hard candy, with hints of licorice                                                                                 | none - very strong |
| pungent                                     | strong, biting (acid) aroma                                                                                                                                              | none - very strong |
| clove                                       | characteristic of clove buds: fruity, medicinal, minty, woody notes (reference material)                                                                                 | none - very strong |
| anise                                       | characteristic of anise (reference material)                                                                                                                             | none - very strong |
| <b>color</b>                                |                                                                                                                                                                          |                    |
| color intensity                             | intensity of the infusion color ranging from pale straw color to dark beige                                                                                              | none - very strong |
| <b>flavor / taste/ trigeminal sensation</b> |                                                                                                                                                                          |                    |
| natural basil flavor                        | typical of fresh basil, sweet, refreshing, slightly peppery and licorice-anise                                                                                           | none - very strong |
| fresh flavor                                | characteristic of mint, freshly cut grass, unripe fruit.                                                                                                                 | none - very strong |
| herbal flavor                               | characteristic of dried basil or herbal mixture of Provencal herbs                                                                                                       | none - very strong |
| sweet taste                                 | basic taste quality, it does not need to be defined                                                                                                                      | none - very strong |
| bitter taste                                | basic taste quality, it does not need to be defined                                                                                                                      | none - very strong |
| astringent sensation                        | perception of a puckering sensation in the mouth when the sample is spread over the palate. caused by substances such as tannins and alum and long lasting in the mouth. | none - very strong |
| aftertaste                                  | general sensation appearing after the disappearance of the taste stimulus.                                                                                               | none - very strong |
